# Supplementary material for: High-throughput sequencing data revealed genotype-specific changes evoked by heat stress in crown tissue of barley sdw1 near-isogenic lines
Source: PubMed Central journal article supplement (PMC8897901; doi:10.1186/s12864-022-08410-1), 2022-03-04
Supplement: 12864_2022_8410_MOESM1_ESM.pdf [file 12864_2022_8410_MOESM1_ESM.pdf]

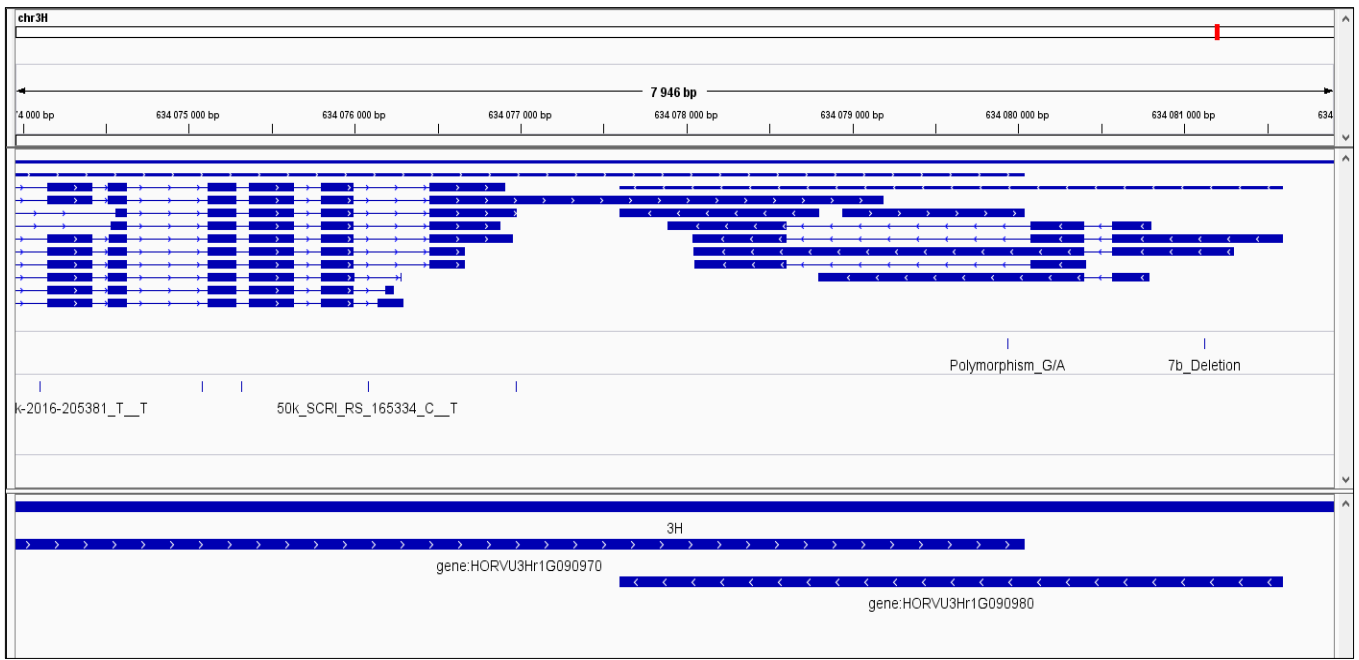

Figure S1

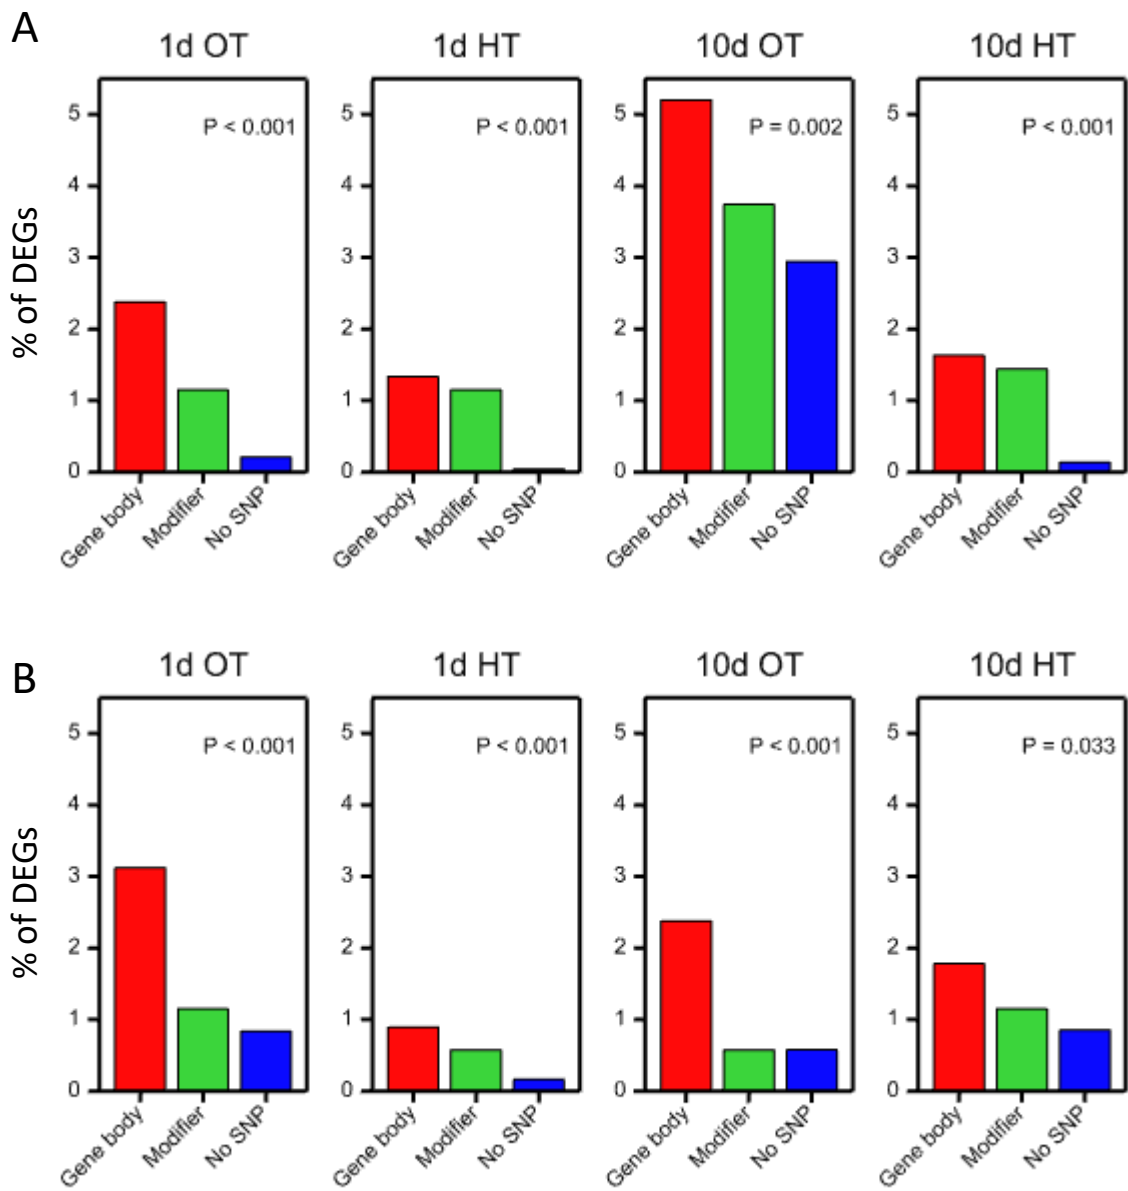

Figure S2

A

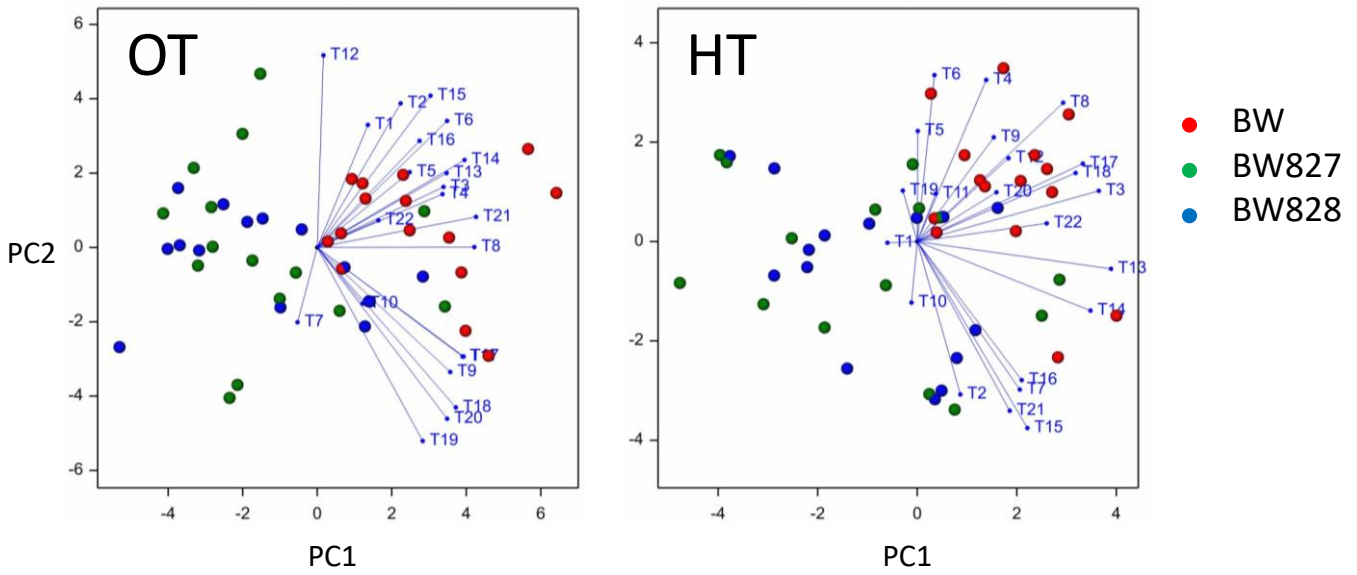

B

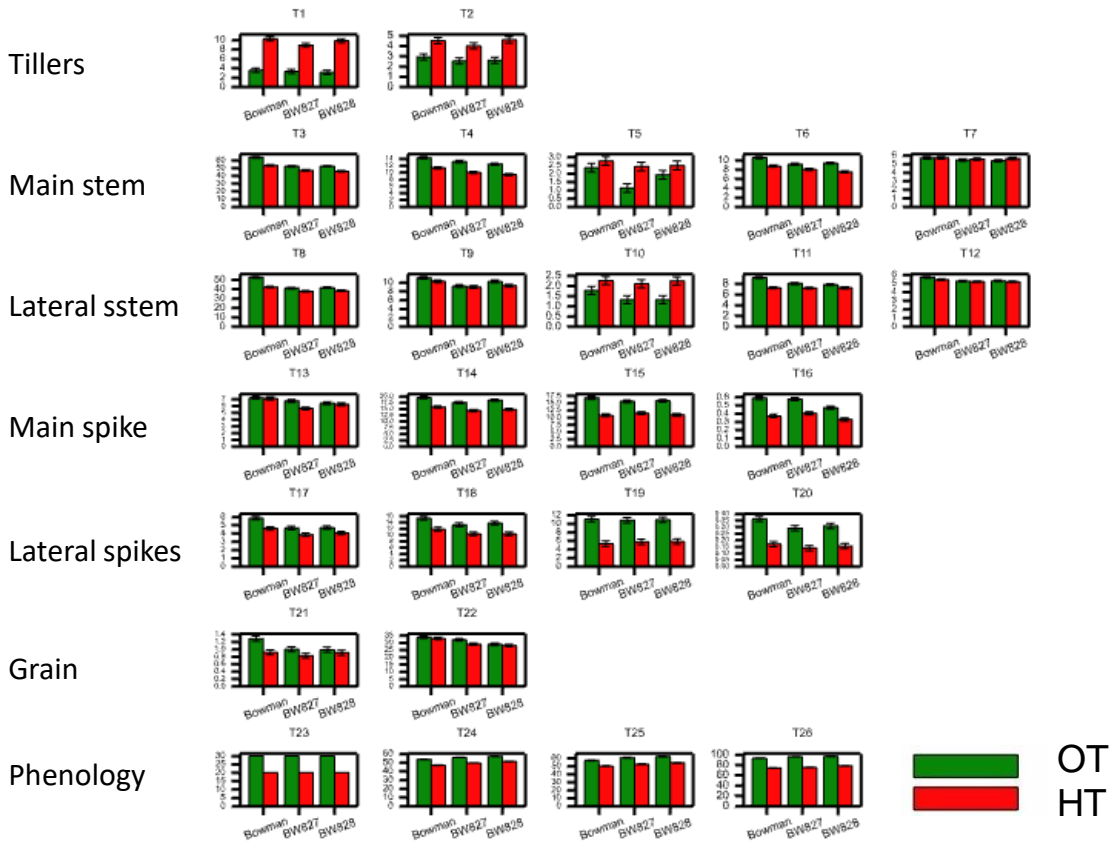

Figure S3

A

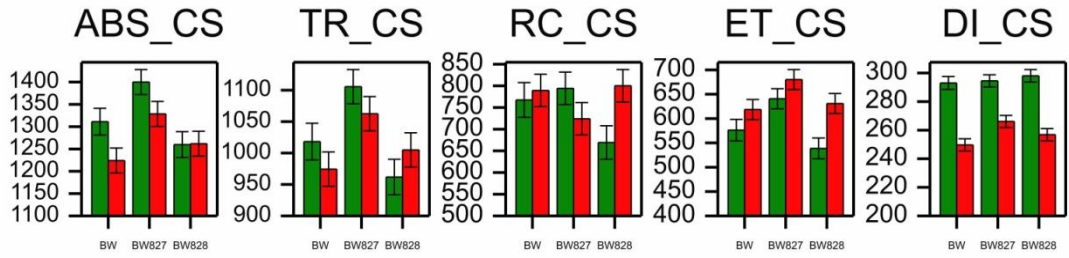

B

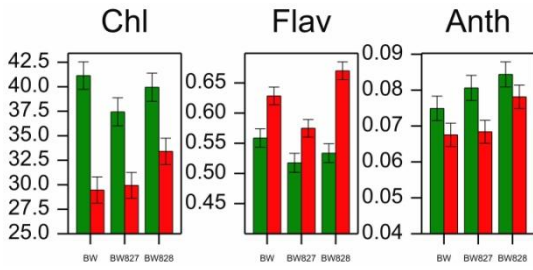

C

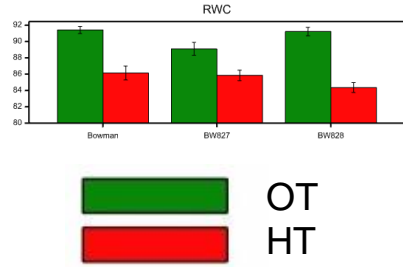

Figure S4
